# Supplementary material
Source: bioRxiv or medRxiv preprint supplement (https://www.biorxiv.org/highwire/filestream/65392/field_highwire_adjunct_files/0/203158-1.pdf)
Supplement: Supplementary file [file 203158-1.pdf]

# Supplementary Table S1

| Chromosome | Gene          | Insert start | Insert end | Amplicon name |
|------------|---------------|--------------|------------|---------------|
| chr1       | <b>NRAS</b>   | 115256325    | 115256546  | NRAS_1        |
| chr1       | <b>NRAS</b>   | 115258554    | 115258776  | NRAS_2        |
| chr11      | <b>WT1</b>    | 32413416     | 32413641   | WT1_2         |
| chr11      | <b>WT1</b>    | 32414126     | 32414348   | WT1_1         |
| chr11      | <b>WT1</b>    | 32417766     | 32417992   | WT1_3         |
| chr11      | <b>CBL</b>    | 119148819    | 119149034  | CBL_2         |
| chr11      | <b>CBL</b>    | 119149210    | 119149431  | CBL_1         |
| chr12      | <b>KRAS</b>   | 25380260     | 25380466   | KRAS_2        |
| chr12      | <b>KRAS</b>   | 25398184     | 25398405   | KRAS_1        |
| chr12      | <b>KRAS</b>   | 25378550     | 25378658   | KRAS_3        |
| chr12      | <b>PTPN11</b> | 112888117    | 112888327  | PTPN11_2      |
| chr12      | <b>PTPN11</b> | 112926780    | 112926999  | PTPN11_1      |
| chr13      | <b>FLT3</b>   | 28592495     | 28592723   | FLT3_1        |
| chr13      | <b>FLT3</b>   | 28602180     | 28602404   | FLT3_3        |
| chr13      | <b>FLT3</b>   | 28608138     | 28608361   | FLT3_2        |
| chr13      | <b>FLT3</b>   | 28609548     | 28609769   | FLT3_4        |
| chr15      | <b>IDH2</b>   | 90631735     | 90631962   | IDH2_1        |
| chr17      | <b>TP53</b>   | 7576954      | 7577180    | TP53_4        |
| chr17      | <b>TP53</b>   | 7577398      | 7577615    | TP53_2        |
| chr17      | <b>TP53</b>   | 7578087      | 7578296    | TP53_1        |
| chr17      | <b>TP53</b>   | 7578385      | 7578605    | TP53_3        |

| Chromosome | Gene          | Insert start | Insert end | Amplicon name |
|------------|---------------|--------------|------------|---------------|
| chr17      | <b>MIR142</b> | 56408608     | 56408751   | MIR142_1      |
| chr17      | <b>SRSF2</b>  | 74732883     | 74733050   | SRSF2_2       |
| chr2       | <b>DNMT3A</b> | 25457136     | 25457351   | DNMT3A_10     |
| chr2       | <b>DNMT3A</b> | 25458489     | 25458714   | DNMT3A_6      |
| chr2       | <b>DNMT3A</b> | 25461897     | 25462088   | DNMT3A_13     |
| chr2       | <b>DNMT3A</b> | 25463103     | 25463329   | DNMT3A_2      |
| chr2       | <b>DNMT3A</b> | 25463446     | 25463673   | DNMT3A_5      |
| chr2       | <b>DNMT3A</b> | 25466627     | 25466857   | DNMT3A_1      |
| chr2       | <b>DNMT3A</b> | 25470473     | 25470641   | DNMT3A_4      |
| chr2       | <b>SF3B1</b>  | 198266762    | 198266977  | SF3B1_1       |
| chr2       | <b>SF3B1</b>  | 198267157    | 198267384  | SF3B1_2       |
| chr2       | <b>IDH1</b>   | 209112899    | 209113123  | IDH1_1        |
| chr20      | <b>ASXL1</b>  | 31022370     | 31022586   | ASXL1_1       |
| chr20      | <b>ASXL1</b>  | 31022846     | 31023073   | ASXL1_2       |
| chr21      | <b>RUNX1</b>  | 36164786     | 36164997   | RUNX1_5       |
| chr21      | <b>RUNX1</b>  | 36171483     | 36171710   | RUNX1_2       |
| chr21      | <b>RUNX1</b>  | 36206706     | 36206884   | RUNX1_3       |
| chr21      | <b>RUNX1</b>  | 36231605     | 36231834   | RUNX1_4       |
| chr21      | <b>RUNX1</b>  | 36252812     | 36253007   | RUNX1_7       |
| chr21      | <b>U2AF1</b>  | 44514701     | 44514922   | U2AF1_1       |
| chr21      | <b>U2AF1</b>  | 44524280     | 44524505   | U2AF1_2       |

| Chromosome | Gene         | Insert start | Insert end | Amplicon name |
|------------|--------------|--------------|------------|---------------|
| chr3       | <b>GATA2</b> | 128202724    | 128202891  | GATA2_1       |
| chr4       | <b>KIT</b>   | 55589608     | 55589829   | KIT_2         |
| chr4       | <b>KIT</b>   | 55599232     | 55599448   | KIT_1         |
| chr4       | <b>TET2</b>  | 106156635    | 106156850  | TET2_15       |
| chr4       | <b>TET2</b>  | 106156867    | 106157094  | TET2_10       |
| chr4       | <b>TET2</b>  | 106157752    | 106157947  | TET2_13       |
| chr4       | <b>TET2</b>  | 106163914    | 106164128  | TET2_1        |
| chr4       | <b>TET2</b>  | 106164753    | 106164980  | TET2_6        |
| chr4       | <b>TET2</b>  | 106180645    | 106180865  | TET2_8        |
| chr4       | <b>TET2</b>  | 106182821    | 106183021  | TET2_5        |
| chr4       | <b>TET2</b>  | 106190719    | 106190932  | TET2_7        |
| chr4       | <b>TET2</b>  | 106196089    | 106196313  | TET2_3        |
| chr4       | <b>TET2</b>  | 106197100    | 106197318  | TET2_2        |
| chr5       | <b>NPM1</b>  | 170837502    | 170837616  | NPM1_1        |
| chr7       | <b>EZH2</b>  | 148504655    | 148504874  | EZH2_1        |
| chr7       | <b>EZH2</b>  | 148506333    | 148506547  | EZH2_2        |
| chr8       | <b>RAD21</b> | 117878729    | 117878946  | RAD21_1       |
| chr9       | <b>JAK2</b>  | 5073564      | 5073785    | JAK2_1        |
| chrX       | <b>STAG2</b> | 123179102    | 123179318  | STAG2_1       |
| chrX       | <b>PHF6</b>  | 133549083    | 133549301  | PHF6_1        |

Supplementary Figure 1

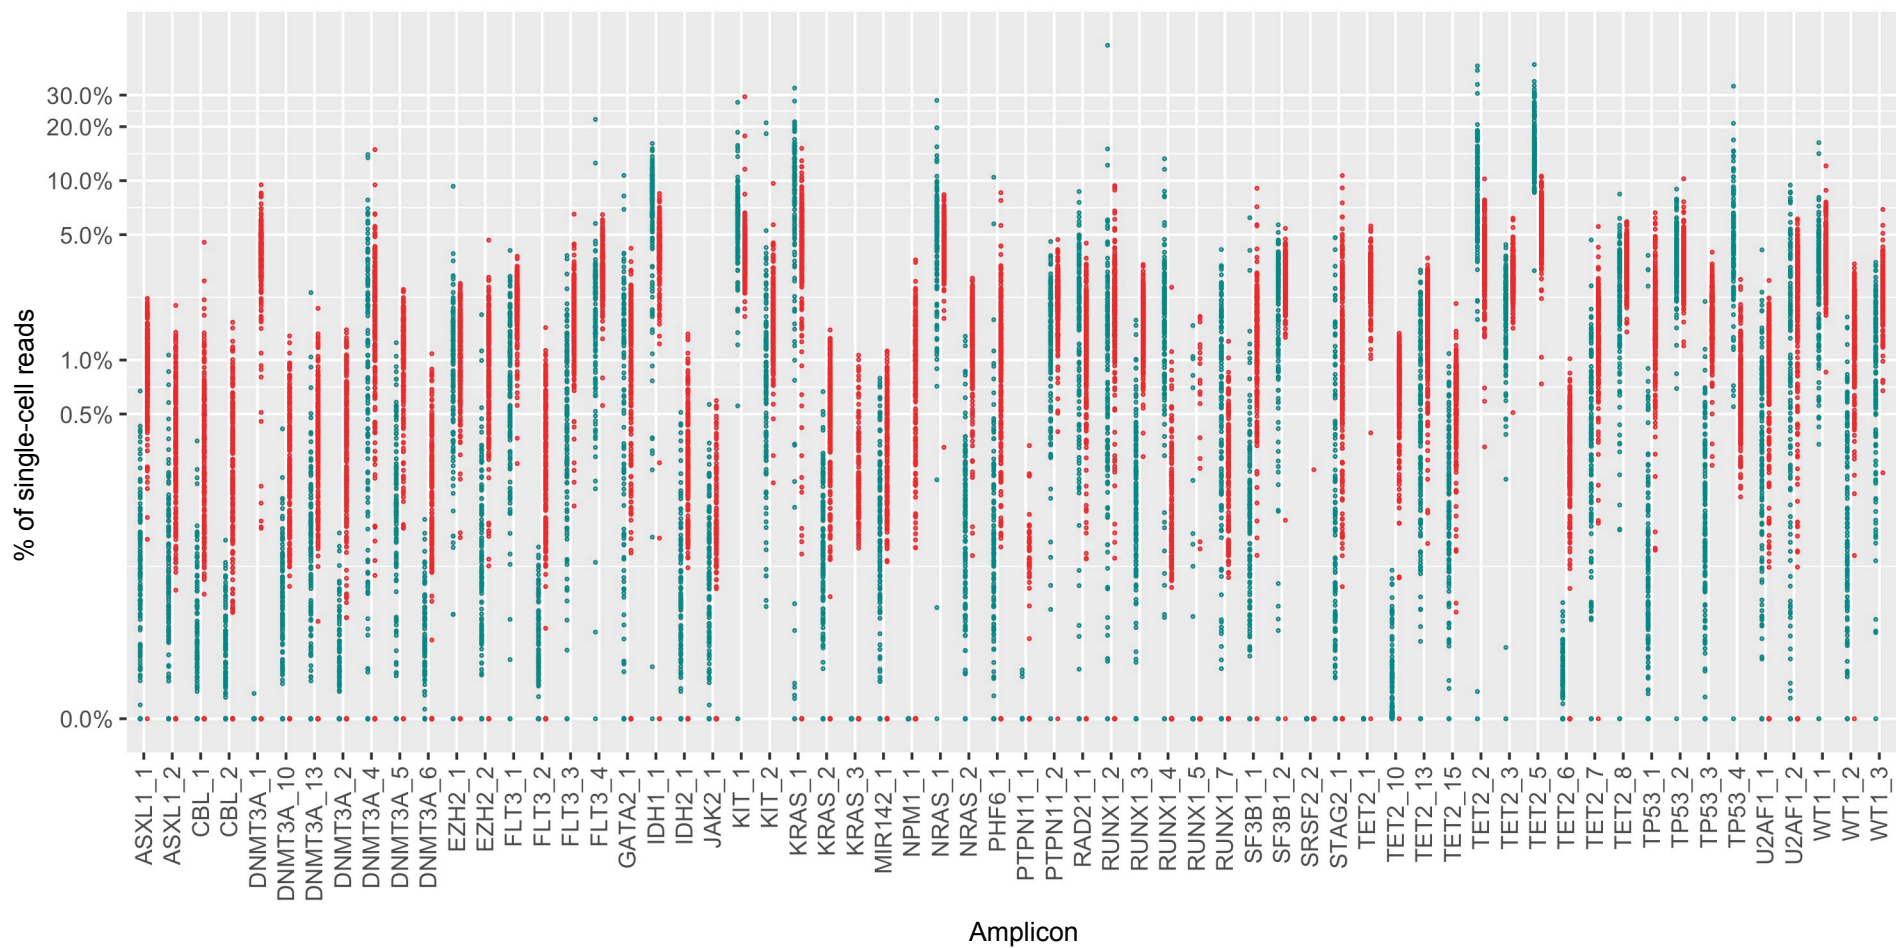

# Supplementary Figure 2

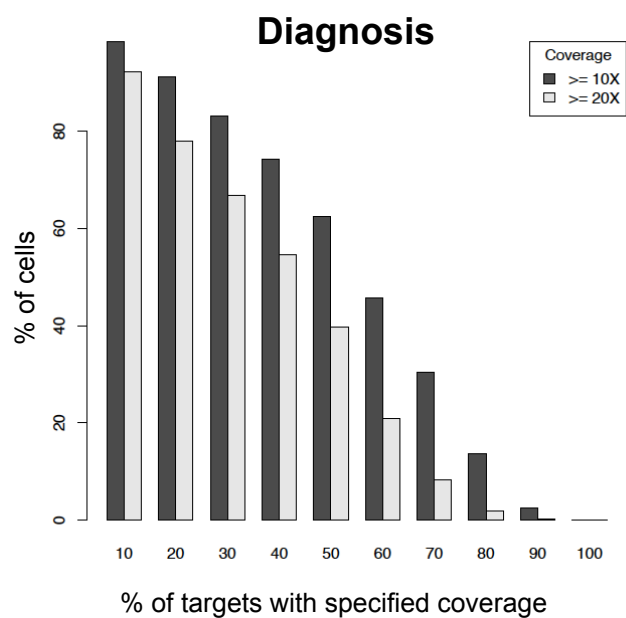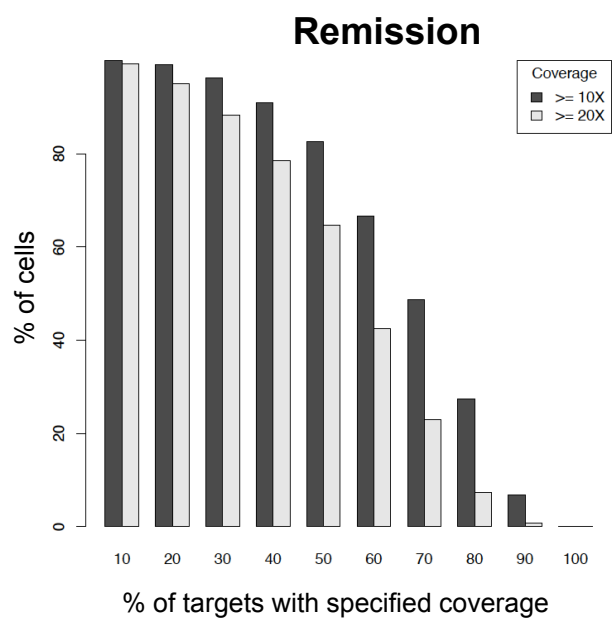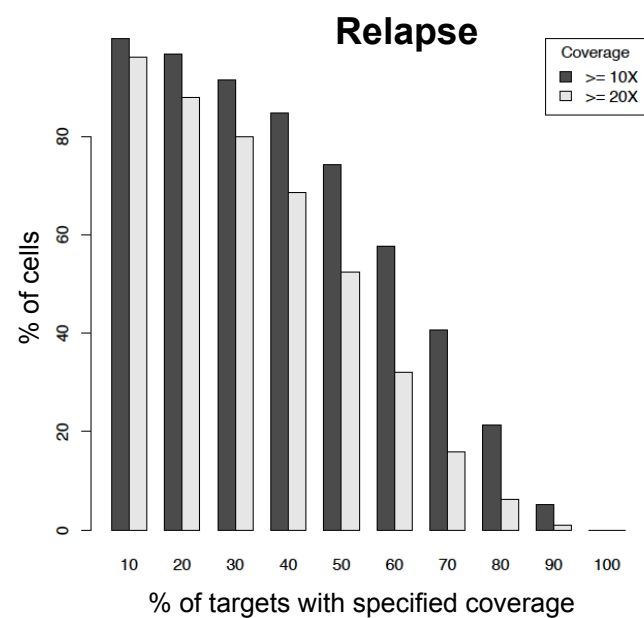

## Supplementary Table S2

| Gene          | Transcript   | Strand | Variant coordinates (gDNA/cDNA/protein)                                                                             | Region                        |
|---------------|--------------|--------|---------------------------------------------------------------------------------------------------------------------|-------------------------------|
| <i>DNMT3A</i> | NM_022552    | -      | chr2:g.25457192G>A/c.2695C>T/p.R899C                                                                                | cds_in_exon_23                |
| <i>DNMT3A</i> | NM_022552    | -      | chr2:g.25458546C>T/c.2597+30G>A/.                                                                                   | intron_between_exon_22_and_23 |
| <i>DNMT3A</i> | NM_022552    | -      | chr2:g.25463483G>A/c.2173+26C>T/.                                                                                   | intron_between_exon_18_and_19 |
| <i>SF3B1</i>  | NM_012433    | -      | chr2:g.198266943C>T/c.2078-89G>A/.                                                                                  | intron_between_exon_14_and_15 |
| <i>IDH1</i>   | NM_001282387 | -      | chr2:g.209113058delA/c.414+44delT/.                                                                                 | intron_between_exon_4_and_5   |
| <i>KIT</i>    | NM_000222    | +      | chr4:g.55599436T>C/c.2484+78T>C/.                                                                                   | intron_between_exon_17_and_18 |
| <i>TET2</i>   | NM_001127208 | +      | chr4:g.106196092C>T/c.4538-113C>T/.                                                                                 | intron_between_exon_10_and_11 |
| <i>NPM1</i>   | NM_002520    | +      | chr5:g.170837526delT/c.847-5delT/.                                                                                  | intron_between_exon_10_and_11 |
| <i>EZH2</i>   | NM_001203247 | -      | chr7:g.148504722delG/c.2241+21delC/.                                                                                | 3-UTR;noncoding_exon_20       |
| <i>EZH2</i>   | NM_001203247 | -      | chr7:g.148504855_148504859dupGACTT/c.2181-61_2181-57dupAAGTC/.                                                      | intron_between_exon_19_and_20 |
| <i>FLT3</i>   | NM_004119    | -      | chr13:g.28608255_28608275dupGATCATATTCATATTCTCTGA/<br>c.1784_1804dupGAGAATATGAATATGATCTCA/<br>p.R595_L601dupREYEYDL | cds_in_exon_14                |
| <i>TP53</i>   | NM_001126115 | -      | chr17:g.7577180C>T/c.387-25G>A/.                                                                                    | intron_between_exon_3_and_4   |
| <i>TP53</i>   | NM_001126115 | -      | chr17:g.7577407A>C/c.386+92T>G/.                                                                                    | intron_between_exon_3_and_4   |
| <i>TP53</i>   | NM_001126115 | -      | chr17:g.7577427G>A/c.386+72C>T/.                                                                                    | intron_between_exon_3_and_4   |
| <i>TP53</i>   | NM_001126115 | -      | chr17:g.7578115T>C/c.276+62A>G/.                                                                                    | intron_between_exon_2_and_3   |
| <i>TP53</i>   | NM_001126115 | -      | chr17:g.7578394T>C/c.140A>G/p.H47R                                                                                  | cds_in_exon_1                 |
| <i>ASXL1</i>  | NM_015338    | +      | chr20:g.31022959T>C/c.2444T>C/p.L815P                                                                               | cds_in_exon_12                |

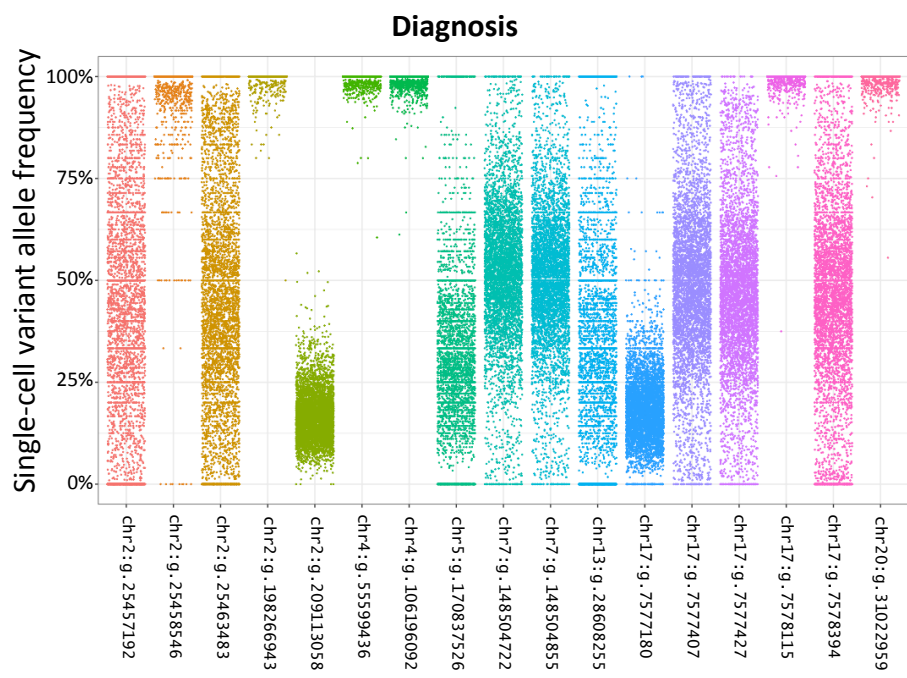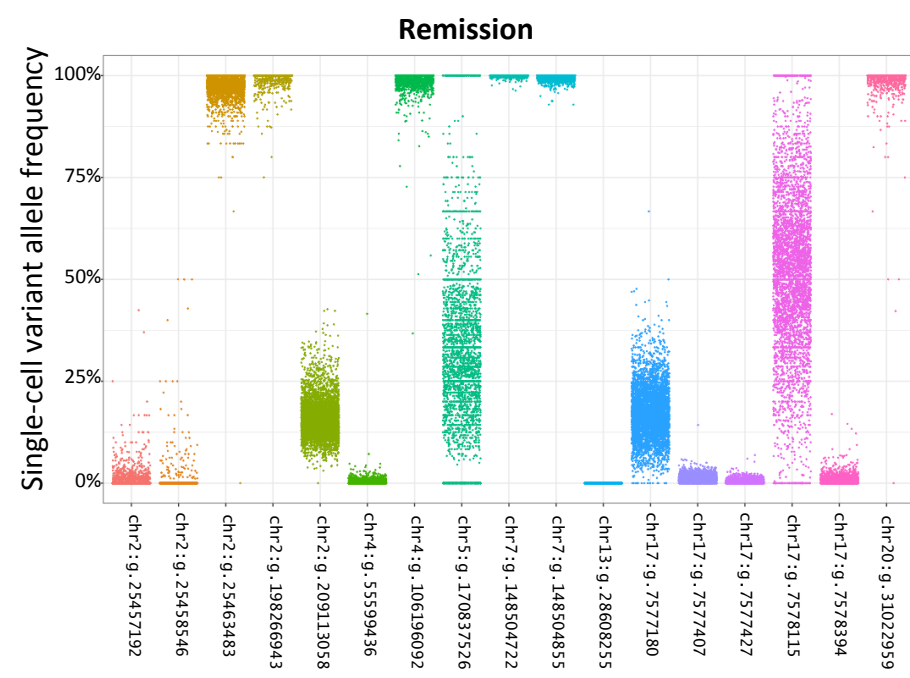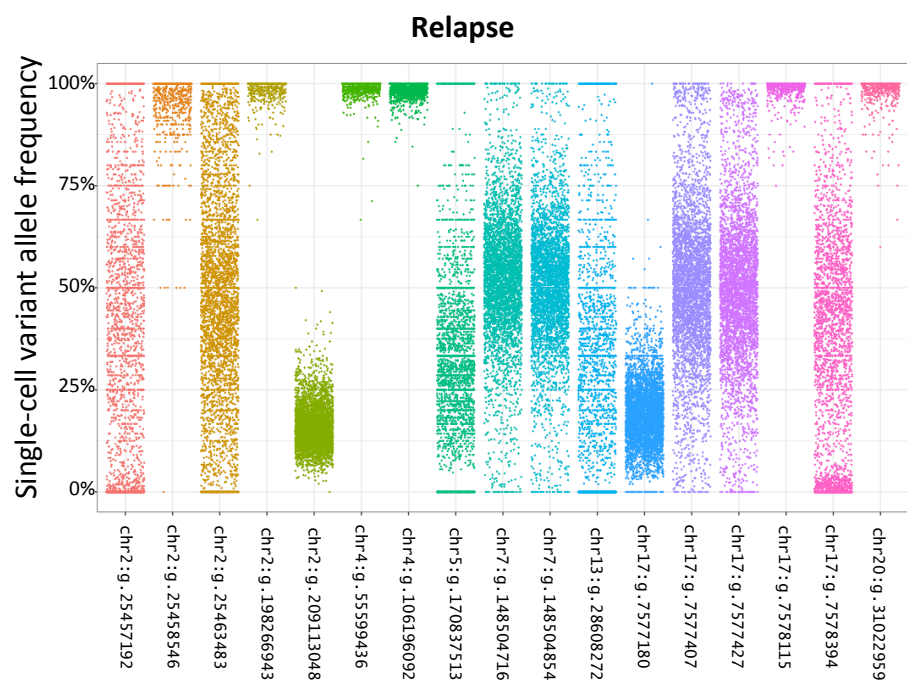

Supplementary Figure 3

Supplementary Figure 4

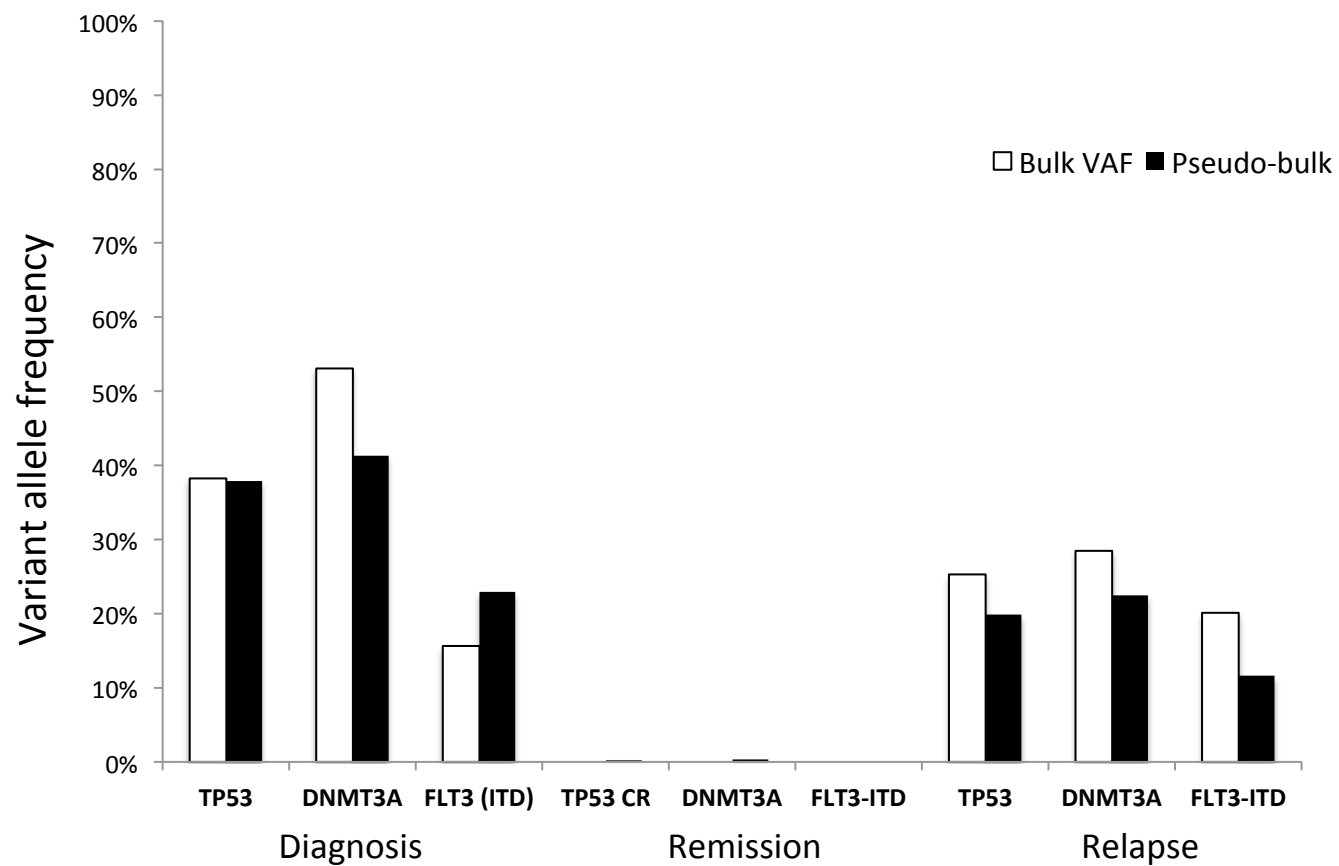

## Supplementary Table S3

List of 295 genes targeted by bulk sequencing

| Gene name |        |         |           |           |         |          |         |         |              |
|-----------|--------|---------|-----------|-----------|---------|----------|---------|---------|--------------|
| ABCC9     | CALR   | CUL5    | FANCD2    | HIST1H2BF | LEF1    | NBN      | PLA2G2D | SF3B1   | TINF2 (TIN2) |
| ABL1      | CARD11 | CUX1    | FANCE     | HIST1H3D  | LRP1B   | NCOR1    | PLCG2   | SFRS1   | TLR2         |
| ACTG1     | CBL    | CYLD    | FANCG     | HIST1H4D  | LTB     | NCOR2    | POT1    | SFRS7   | TLR9         |
| AKT1      | CBLB   | DAXX    | FANCI     | HNRNPK    | LUC7L2  | NF1      | POU2AF1 | SGK1    | TNFAIP3      |
| ANKRD11   | CCND1  | DCLRE1C | FANCL     | HRAS      | LYN     | NFE2     | PRDM1   | SH2B3   | TNFRSF14     |
| ARID1A    | CCND3  | DDX3X   | FAS       | ICOS      | MALT1   | NFKB1    | PRKCB   | SHH     | TNKS         |
| ARID1B    | CD200  | DIS3    | FAT1      | ID3       | MAP2K1  | NFKB2    | PTEN    | SMAD2   | TOX          |
| ARID2     | CD274  | DKC1    | FAT3      | IDH1      | MAPK1   | NFKBIA   | PTPN1   | SMC1A   | TP53         |
| ARID5B    | CD58   | DLC1    | FBXW7     | IDH2      | MAX     | NFKBIE   | PTPN11  | SMC3    | TRAF3        |
| ARPP21    | CD79A  | DNM2    | FGFR3     | IKBKA     | MDM2    | NOTCH1   | RAD21   | SMC5    | TRAF6        |
| ASXL1     | CD79B  | DNMT1   | FLI1      | IKZF1     | MED12   | NOTCH2   | RAD51C  | SNX7    | TYK2         |
| ATF7IP    | CDK4   | DNMT3A  | FLT3      | IKZF2     | MEF2B   | NPM1     | RAG1    | SOCS1   | TYK3         |
| ATM       | CDKN2A | DNMT3B  | FNDC3A    | IKZF3     | MEF2C   | NR3C2    | RAG2    | SOX5    | U2AF1        |
| ATRX      | CDKN2B | EBF1    | FOXP1     | IL7R      | MGA     | NRAS     | RASA2   | SP140   | U2AF2        |
| B2M       | CDKN2C | ECT2L   | FYN       | IRAK1     | miR125a | NSD2     | RB1     | SPEN    | UBR5         |
| BCL10     | CEBPA  | EED     | G6PC3     | IRAK4     | miR-142 | NT5C2    | REL     | SPIB    | USP29        |
| BCL2      | CEBPE  | EGR1    | GAB2      | IRF1      | miR155  | PAG1     | RELA    | SRSF2   | VPREB1       |
| BCL6      | CHD2   | EGR2    | GATA1     | IRF4      | miR15a  | PALB2    | RELB    | STAG1   | WHSC1        |
| BCL7A     | CHK2   | ELANE   | GATA2     | IRF7      | miR16-1 | PAX5     | RELN    | STAG2   | WHSC1L1      |
| BCOR      | CIITA  | EP300   | GATA3     | ITPKB     | MIR17HG | PDCD1    | RHOA    | STAT1   | WT1          |
| BCR       | CNOT3  | EPHA7   | GCET2     | JAK1      | miR21   | PDCD1LG2 | RIPK1   | STAT3   | XPO1         |
| BIRC3     | CREBBP | EPOR    | GFI1B     | JAK2      | mir34b  | PDGFRB   | ROBO1   | SUZ12   | ZAP70        |
| BLK       | CRLF2  | ERG     | GNA13     | JAK3      | mir34c  | PEG3     | ROR1    | SYK     | ZMYM2        |
| BMI1      | CSF2RA | ETV6    | GNAS      | JARID2    | MLL     | PHF6     | RPL10   | TBL1XR1 | ZMYM3        |
| BRAF      | CSF3R  | EZH2    | GNB1      | KDM4C     | MLL2    | PHIP     | RPL5    | TCF3    | ZRSR2        |
| BRIP1     | CTBP1  | FAM46C  | GPRC5A    | KDM6A     | MLL3    | PIGA     | RUNX1   | TERC    |              |
| BTG1      | CTBP2  | FAM5C   | HAX1      | KIT       | MPL     | PIK3CA   | RUNX2   | TERT    |              |
| BTK       | CTCF   | FANCA   | HIST1H1E  | KLHL6     | MS4A1   | PIK3CB   | SAMHD1  | TET1    |              |
| BTLA      | CTLA4  | FANCB   | HIST1H2AD | KRAS      | MYB     | PIK3CG   | SETBP1  | TET2    |              |
| C22orf194 | CTNNA1 | FANCC   | HIST1H2BE | LAMB4     | MYD88   | PIK3R1   | SETD2   | TGDS    |              |

## Supplementary Table S4

| Gene         | Transcript   | Strand | Variant coordinates (gDNA/cDNA/protein)                        | Region                        |
|--------------|--------------|--------|----------------------------------------------------------------|-------------------------------|
| <i>NRAS</i>  | NM_002524    | -      | chr1:g.115258745C>G/c.37G>C/p.G13R                             | cds_in_exon_2                 |
| <i>SF3B1</i> | NM_012433    | -      | chr2:g.198266943C>T/c.2078-89G>A/.                             | intron_between_exon_14_and_15 |
| <i>SF3B1</i> | XM_005246428 | -      | chr2:g.198267246_198267247insG/c.1639+33_1639+34insC/.         | intron_between_exon_15_and_16 |
| <i>IDH1</i>  | XM_005246524 | -      | chr2:g.209113058delA/c.414+44delT/.                            | intron_between_exon_2_and_3   |
| <i>KIT</i>   | NM_000222    | +      | chr4:g.55599436T>C/c.2484+78T>C/.                              | intron_between_exon_17_and_18 |
| <i>NPM1</i>  | NM_002520    | +      | chr5:g.170837457A>G/c.847-74A>G/.                              | intron_between_exon_10_and_11 |
| <i>NPM1</i>  | NM_002520    | +      | chr5:g.170837526delT/c.847-5delT/.                             | intron_between_exon_10_and_11 |
| <i>EZH2</i>  | NM_001203249 | -      | chr7:g.148504718G>A/c.2088+20C>T/.                             | 3-UTR;noncoding_exon_19       |
| <i>EZH2</i>  | NM_001203249 | -      | chr7:g.148504855_148504859dupGACTT/c.2028-61_2028-57dupAAGTC/. | intron_between_exon_18_and_19 |
| <i>JAK2</i>  | NM_004972    | +      | chr9:g.5073691delT/c.1777-7delT/.                              | intron_between_exon_13_and_14 |
| <i>WT1</i>   | XM_005253120 | -      | chr11:g.32417945T>C/c.852A>G/p.R284R                           | cds_in_exon_6                 |
| <i>WT1</i>   | XM_005253120 | -      | chr11:g.32417962A>G/c.844-9T>C/.                               | intron_between_exon_5_and_6   |
| <i>FLT3</i>  | NM_004119    | -      | chr13:g.28592546T>C/c.2541+58A>G/.                             | intron_between_exon_20_and_21 |
| <i>FLT3</i>  | NM_004119    | -      | chr13:g.28602256C>T/c.2053+59G>A/.                             | intron_between_exon_16_and_17 |
| <i>IDH2</i>  | XM_005254893 | -      | chr15:g.90631934C>T/c.263G>A/p.R140Q                           | cds_in_exon_4                 |
| <i>TP53</i>  | NM_001126115 | -      | chr17:g.7577180C>T/c.387-25G>A/.                               | intron_between_exon_3_and_4   |
| <i>TP53</i>  | NM_001126115 | -      | chr17:g.7578115T>C/c.276+62A>G/.                               | intron_between_exon_2_and_3   |
| <i>SRSF2</i> | NM_001195427 | -      | chr17:g.74732959G>T/c.284C>A/p.P95H                            | cds_in_exon_1                 |
| <i>ASXL1</i> | NM_015338    | +      | chr20:g.31022449dupG/c.1934dupG/p.G646Wfs*12                   | cds_in_exon_13                |
| <i>ASXL1</i> | NM_015338    | +      | chr20:g.31022959T>C/c.2444T>C/p.L815P                          | cds_in_exon_13                |
